# Supplementary material
Source: HighWire-hosted journal article supplement (https://jnm.snmjournals.org/highwire/filestream/94815/field_highwire_adjunct_files/0/154443_Supplemental_Data.pdf)
Supplement: 154443_Supplemental_Data.pdf [file 154443_Supplemental_Data.pdf]

## **SUPPLEMENTAL MATERIALS**

### **Methods and Materials**

#### **Immunohistochemical Staining and Semi-quantitative Determination**

Liposomal delivery of angiogenic peptides and therapeutic effectiveness were also immunohistologically studied by semi-quantitatively determining vascular density using von Willebrand factor-positive staining and neuroprotection using glial fibrillary acidic protein (GFAP)-positive staining (n=12/group, respectively). Animals treated with and without liposomal angiogenic peptides were sacrificed eight days post-surgery. The brains were fixed with 10% formalin for 48 hours, washed, and paraffin-embedded. The coronal slices of the brains were sectioned (6  $\mu\text{m}$  in thickness), de-paraffinized, and rehydrated. After heat treatment, the tissue specimens were incubated overnight (4 °C) with the primary antibody against von Willebrand factor (DAKO; 1:500) as a marker for endothelial phenotype and GFAP (abcam; 1:3000) as a marker for astrocyte activation. After incubating with the primary antibodies, the sections were conjugated with biotin-labeled secondary antibodies, which were later detected with 3-amino-9-ethylcarbazole chromogen (Dako). The immunostained tissues were then photographed with a camera connected to a microscope.

The total number of von Willebrand factor-positive vessels present in the ischemic border and GFAP-positive cells present in the ischemic hemisphere were counted. Six fields were randomly chosen from the areas of interest. The means from the six fields are presented.

#### **RNA Isolation and RT-PCR Analysis**

The total RNA (n=4/groups) was isolated from the ipsilateral cortex using RNeasy mini kits (Qiagen). Briefly, the tissues from the ipsilateral cortex of the brain were homogenized using a dounce homogenizer in RLT lysis buffer, and RNA was extracted using an elution

volume of 40  $\mu$ l. Complementary DNA was reverse transcribed from the purified RNA (1  $\mu$ g) using RNA to cDNA EcoDry™ Premix (Life technology) in a total volume of 20  $\mu$ l (Clontech). The reaction condition was 42 °C for 60 minutes, followed by 70 °C for 10 minutes using the ABI 9700 thermal PCR cyclers (Applied Biosystems). The RT reactions were subjected to quantitative PCR amplification. The complementary DNA products (5  $\mu$ l) were amplified with SYBR Premix Ex Taq II (Takara Bio). The cycling parameters were: one cycle of 95 °C for 10 minutes, followed by 45 cycles of 95 °C for 15 seconds, and 60 °C for 1 minute on a StepOne Plus system (Applied Biosystems). All reactions were performed in triplicate. Absolute expression levels were calculated after normalization to  $\beta$ -actin. The levels of mRNA were expressed as the ratio of negative control without ischemia.

The RT-PCR products were further visualized after electrophoresis migration in a 2% ethidium bromide-stained agarose gel. The bands were viewed under UV light.

### **Gamma Imaging**

Scintigraphy was carried out after administration of liposomes labeled with  $^{99m}\text{Tc}$  HMPAO.  $^{99m}\text{Tc}$  HMPAO (7.4 MBq) was administered via the tail vein, and images were captured at 30 and 90 minutes post-treatment using a gamma image acquisition system.

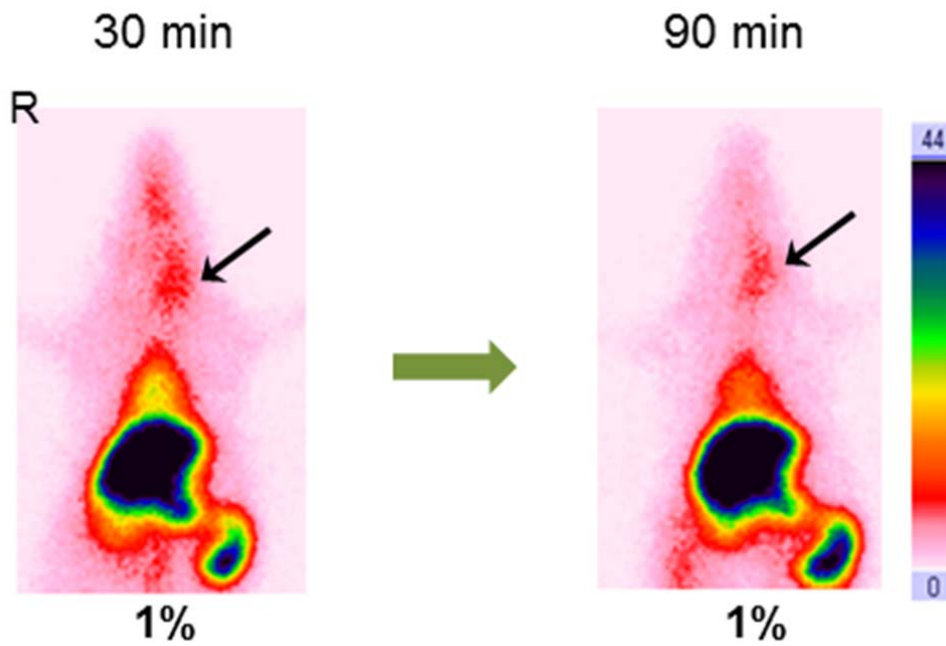

**Supplemental Figure 1.** Radionuclide images of rats following 40 minutes of ischemia show cerebral retention of the  $^{99m}\text{Tc}$  HMPAO-liposome in the ipsilateral hemisphere of the brain. Rats undergoing middle cerebral artery occlusion received  $^{99m}\text{Tc}$  HMPAO-liposomes intra-arterially. SPECT-CT imaging was obtained at 30 and 90 minutes post-injection. Arrows indicate cerebral uptake of  $^{99m}\text{Tc}$  liposomes.
